# Supplementary material for: A multiplexed, next generation sequencing platform for high-throughput detection of SARS-CoV-2
Source: PubMed Central journal article supplement (PMC7930244; doi:10.1038/s41467-021-21653-y), 2021-03-03
Supplement: 41467_2021_21653_MOESM10_ESM.pdf [file 41467_2021_21653_MOESM10_ESM.pdf]

**Title:** Supplementary Data 1.

**Description:** List of SARS-CoV-2 and human primers. Primer sequences, name of the targeted regions, size of amplicons after multiplex and barcode PCR are indicated.

**Title:** Supplementary Data 2.

**Description:** Itemized cost of C19-SPAR-Seq per sample

**Title:** Supplementary Data 3.

**Description:** Description of the proof-of-concept cohort for C19- SPAR-Seq detection of SARS-CoV-2. Barcodes ID, sample identification (ID), date of retrieval, collection method, diagnostic laboratory status, and 'BGI' qRT-PCR results are indicated. These patient samples were used to develop C19-SPAR-Seq detection of SARS-CoV-2 (PoC cohort) (Fig. 1).

**Title:** Supplementary Data 4.

**Description:** Description of test development cohort. Barcodes ID, sample identification (ID), date of retrieval, collection method, diagnostic laboratory qRT-PCR results ('Seegene') are indicated (n = 112). These patient samples were used to establish SARS-CoV-2 clinical status assignment using diagnostic laboratory qRT-PCR results ('Seegene') and to test C19-SPAR-Seq detection of SARS-CoV-2 (Fig. 2,3).

**Title:** Supplementary Data 5.

**Description:** Description of the pilot cohort. Barcodes ID, sample identification (ID), date of retrieval, collection method, diagnostic laboratory qRT-PCR results ('Seegene'), 'BGI' qRT-PCR results are indicated. Filtered archival samples are indicated. (Extended data Fig. 3,4).

**Title:** Supplementary Data 6.

**Description:** Description of the extended cohort. Barcodes ID, sample identification (ID), date of retrieval, collection method, diagnostic laboratory qRT-PCR results ('Seegene'), and 'BGI' qRT-PCR results are indicated (Fig. 4).
